# Supplementary material
Source: publisher figshare collection journal article supplement (https://acs.figshare.com/ndownloader/files/4118704)
Supplement: Supplementary file 1 [file 4118704]

## SI1. Addition of emergent OPs

As in Eq. (1) we write the position of atom  $i$  in subsystem  $S$  as

$$\vec{r}_i = \sum_k \bar{\Phi}_k U_{ki} + \bar{\sigma}_i, \quad (\text{SI1})$$

where  $\bar{\sigma}_i$  denotes the residual displacement of atom  $i$  resulting from a finite truncation of the  $k$  sum. The residuals  $\bar{\sigma}_i$ , in turn, are expressed via a set of OP-like variables  $\bar{\Phi}_{k,new}$ , such that

$$\bar{\sigma}_i = \sum_{k,new} \bar{\Phi}_{k,new} U_{ki,new}, \quad (\text{SI2})$$

where indices  $k,new$  are not in the set of OPs and the polynomials  $U_{ki,new} \equiv U_{k,new}(\vec{r}_i^0)$  are mass-weighted orthogonal to those for the  $\bar{\Phi}_k$  that constitute the initial set of subsystem-centered OPs.

The mapping between OPs and atomic positions is 1:1 when the total number of  $\bar{\Phi}_k$  and  $\bar{\Phi}_{k,new}$  equals the number of atoms  $N$  in the system. Multiplying (SI1) by  $U_{k'i,new}$ , summing over all  $i$ , and using the orthogonality conditions we get

$$\bar{\Phi}_{k,new} = \frac{\sum_{i=1}^N m_i U_{ki,new} \bar{\sigma}_i}{\sum_{i=1}^N m_i \{U_{ki,new}\}^2}. \quad (\text{SI3})$$

Thus additional OPs are constructed from the population of growing residuals.

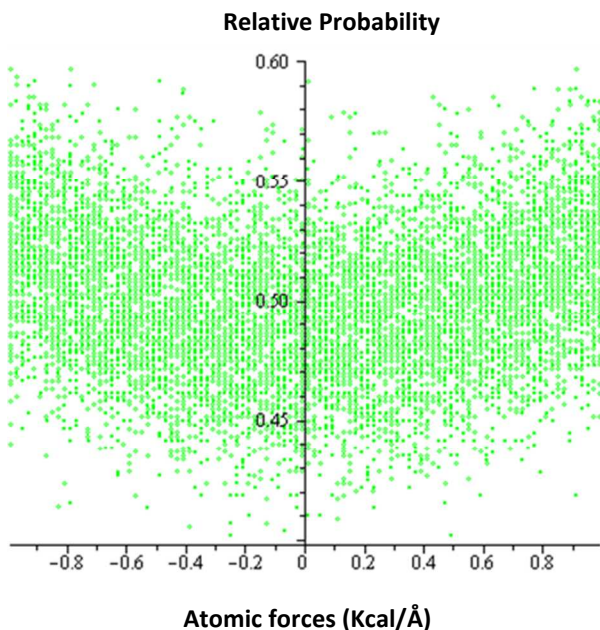

**Fig. S1** Histogram of atomic forces (projected along the ray from the center of mass) for the expanding h4-truncated pentamer at 4 ns. Unlike the OP forces (Figs. 2(a)-(c)), histogram for atomic forces shows no clear trend in direction or magnitude.

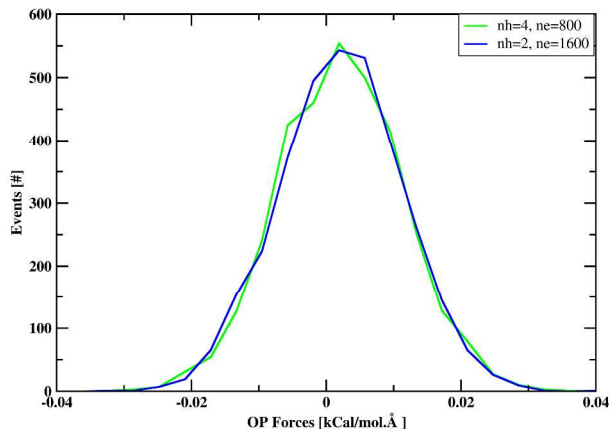

**Fig. S2** Line histograms showing distribution of typical OP forces (here,  $f_k^m$ ;  $k_1=1$ ,  $k_2=0$  and  $k_3=0$ ) for ensembles constructed using  $N_h=4$ ,  $N_e=800$  and  $N_h=2$ ,  $N_e=1600$ . The distribution is in agreement with those from large non-history ensembles ( $N_h=0$ ,  $N_e=3200$ ) and other history enhanced ensembles ( $N_h=8$ ,  $N_e=400$ ) at the same time. Positively peaked distribution of these forces implies overall expansion of the pentamer.

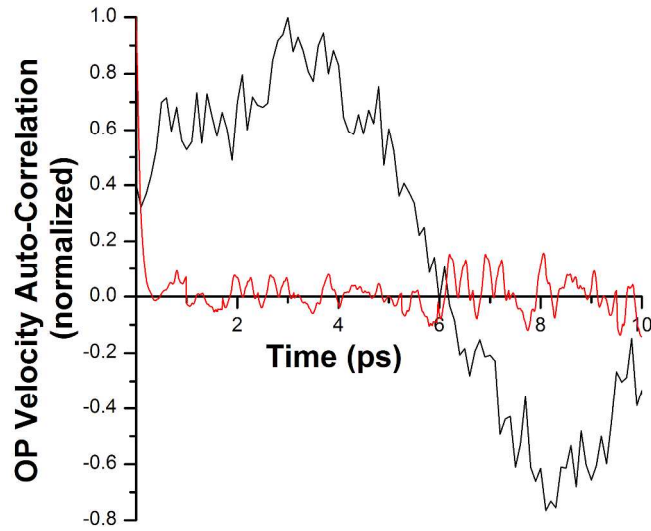

**Fig. S3** Long-time tail appearing in the  $\Phi_{001Z}$  velocity autocorrelation function of one pentamer in the absence of  $\Phi_{100X}$  for the same. Also shown is the velocity autocorrelation decay in  $\Phi_{001Z}$  when all coupled modes, i.e.,  $\bar{\Phi}_k$  for  $\underline{k} = \{000, 100, 010, 001\}$  are incorporated as OPs (red).

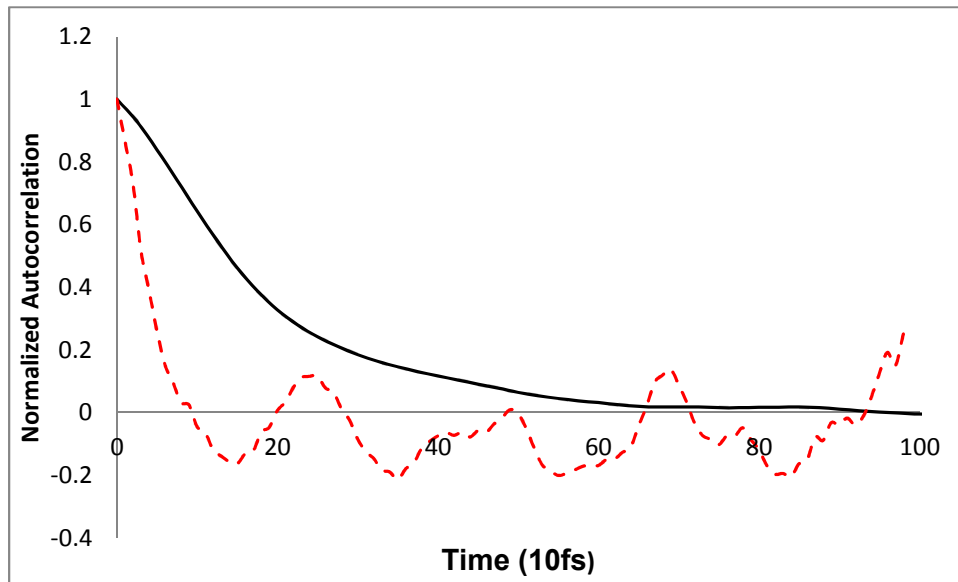

**Fig. S4** The velocity autocorrelation function of a typical OP and the autocorrelation function of the associated force. These functions have correlation times well-separated and a Markovian behavior is expected.

Langevin timestep #

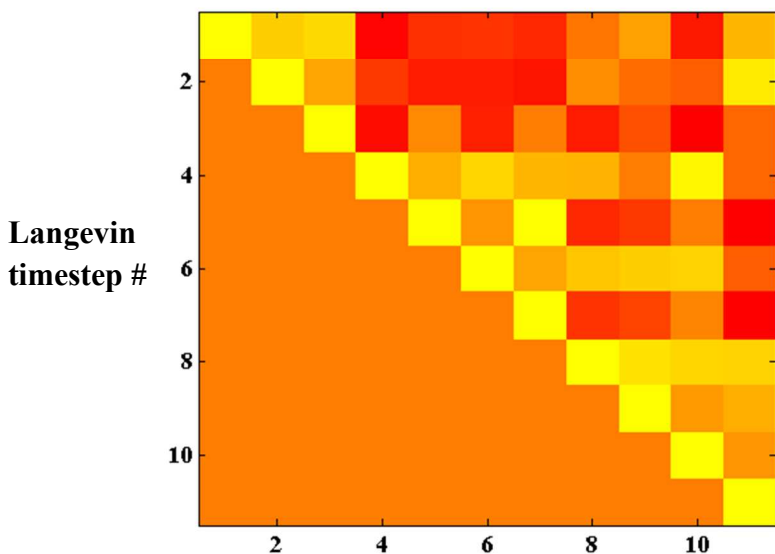

Fig. S5

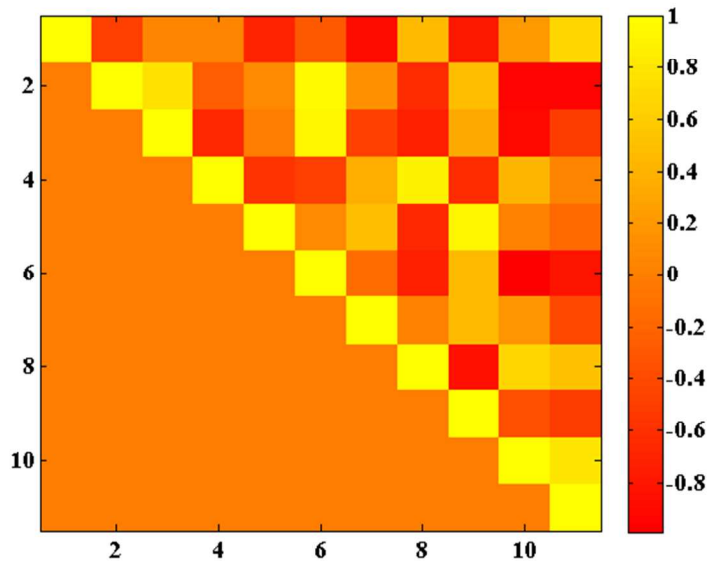

Fig.S6

Correlation between the thermal average forces obtained from constant OP ensembles of size 1600 and 200 every Langevin timestep (20ps), showing off-diagonal terms decrease as ensemble size decreases. This implies coherence in the thermal average forces over time decreases when ensembles used for averaging are incomplete.

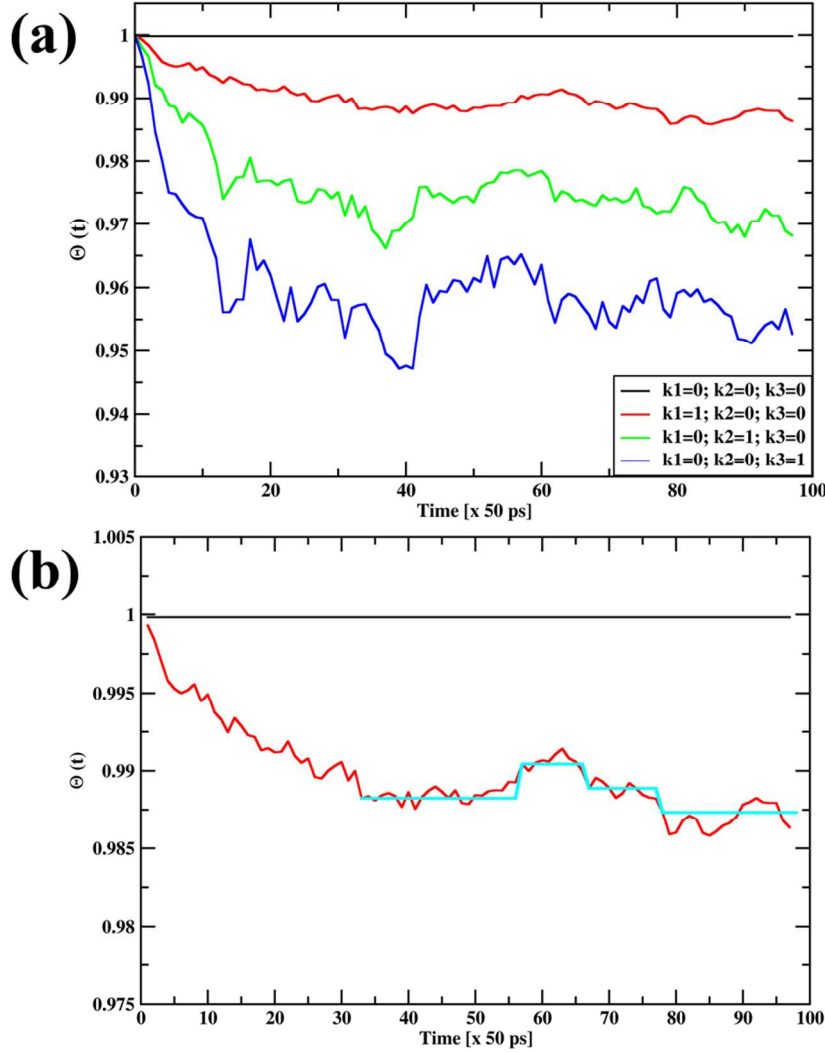

**Fig. S7 (a)** Evolution of  $\Theta(t)$ , cosine of the angle of rotation from the original basis vector

orientation at  $t=0$  to that at time  $t$ , for typical  $\bar{\Phi}_k$ . We define,  $\Theta_k(t) = \frac{\sum_{i=1}^N m_i U_{ki}(t) U_{ki}(0)}{\sum_{i=1}^N m_i \{U_{ki}(0)\}^2}$ .

Deviation of  $\Theta(t)$  from unity implies a change in the reference structure  $\bar{r}_i^0$  as reflected in the dynamical  $U_{ki}$ . **(b)** The basis vectors  $U_{ki}$  (Eq. (1)) rotate slower than do the corresponding OPs (Fig. 4). Thus,  $U_{ki}$  can be held constant over a period of 0.6ns or more (blue line), i.e., thirty

20ps timesteps as  $\Theta$  stays roughly constant over such interval. Every time the reference structure changes, polynomials are reconstructed in terms of the new reference and OPs are redefined.

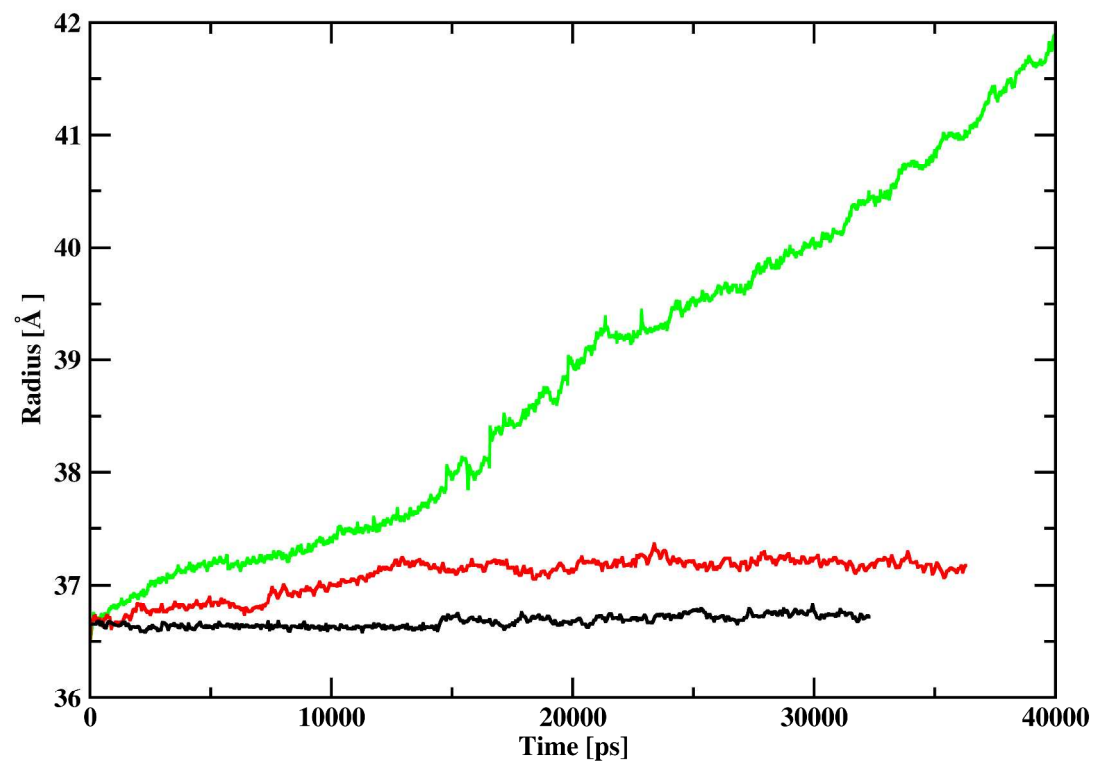

**Fig S8** Changes in radius of gyration over time for a complete (black), h4-truncated (red), and h2,h3,h4-truncated HPV pentamer showing the first two structures initially expand and then remain stable, while the third expands more extensively.
